# Supplementary material for: Liquid/vapor-induced reversible dynamic structural transformation of a three-dimensional Cu-based MOF to a one-dimensional MOF showing gate adsorption
Source: Royal Society of Chemistry journal article supplement (doi:10.1039/c7dt01126a), 2017-01-01
Supplement: c7dt01126a1.pdf [file c7dt01126a1.pdf]

Supporting information

## **Liquid/Vapor-Induced Reversible Dynamic Structural Transformation of a Three-Dimensional Cu-based MOF to a One-Dimensional MOF Showing Gate Adsorption**

Atsushi Kondo,\*<sup>1</sup> Takayuki Suzuki,<sup>1</sup> Ryosuke Kotani<sup>1</sup> and Kazuyuki Maeda\*<sup>1</sup>

<sup>1</sup>*Department of Applied Chemistry, Institute of Engineering, Tokyo University of Agriculture and  
Technology, 2-24-16, Naka-cho, Koganei, Tokyo 184-8588*

Contents

**Figure S1.** TG curve of **1(3D)** at a heating rate of 10 K min<sup>-1</sup> under N<sub>2</sub> flow (100 ml/min).

**Figure S2.** Nitrogen (black) and CO<sub>2</sub> (red) adsorption isotherm on **1(3D)**.

**Figure S3.** Le Bail pattern fit of synchrotron X-ray diffraction pattern **1(3D)** after ethanol immersion at room temperature.

**Figure S4.** FT-IR spectra of **1(3D)** and **2(1D)**.

**Figure S5.** Crystal structure of **1(3D)**.

**Table S1.** CHN elemental analysis of the 3D MOF and the 1D MOF.

**Table S2.** Full width at half maximum (FWHM) of selected diffraction lines in XRD patterns.

**Table S3.** Results of the mixed solution adsorption by gas chromatography.

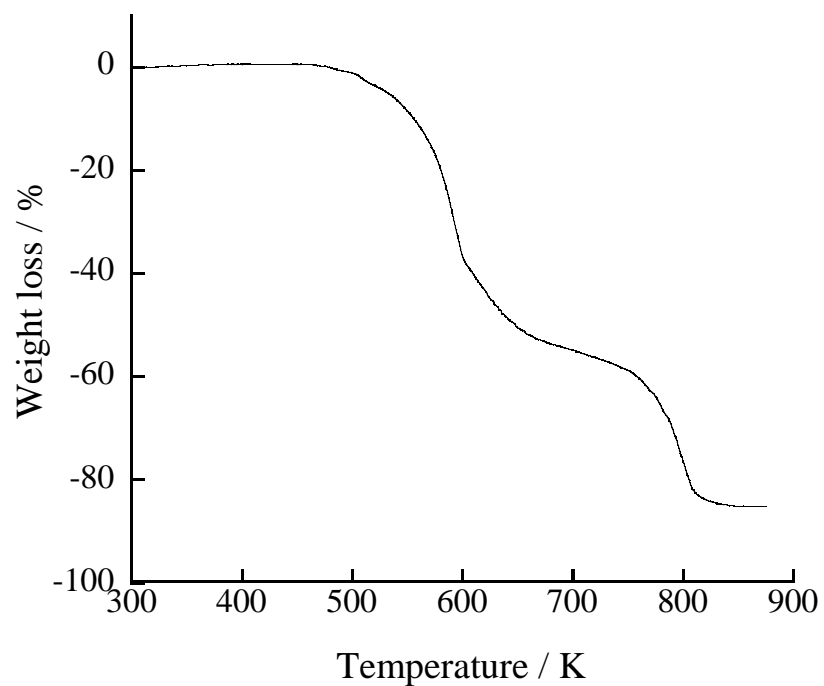

**Figure S1.** A TG curve of **1(3D)** at a heating rate of  $10 \text{ K min}^{-1}$  under air flow ( $150 \text{ ml/min}$ ).

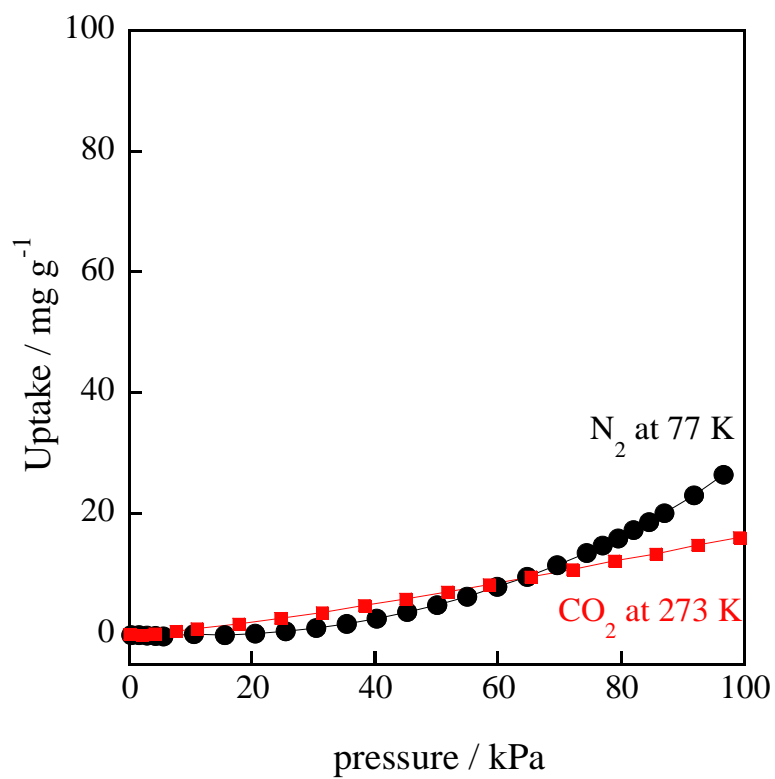

**Figure S2.** Nitrogen (black) and  $\text{CO}_2$  (red) adsorption isotherm on **1(3D)**.

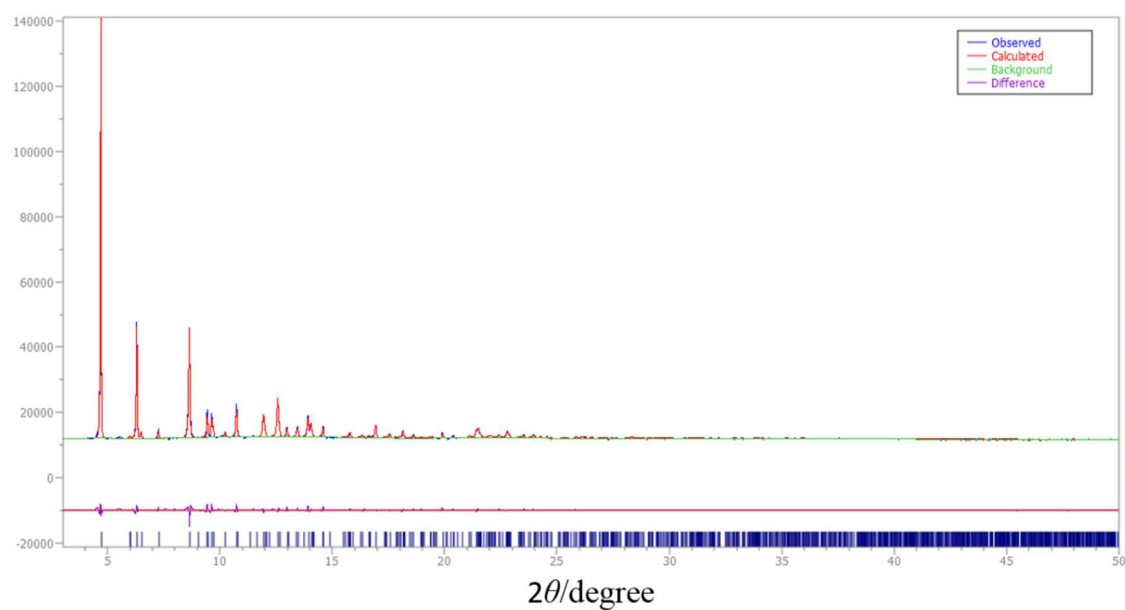

**Figure S3.** Le Bail pattern fit of a synchrotron X-ray diffraction pattern of **1(3D)** after immersion in ethanol/water mixture at a room temperature. Observed, calculated, background, and differential patterns are shown in blue, red, right green, and purple. ( $\lambda = 0.79917(2) \text{ \AA}$ )

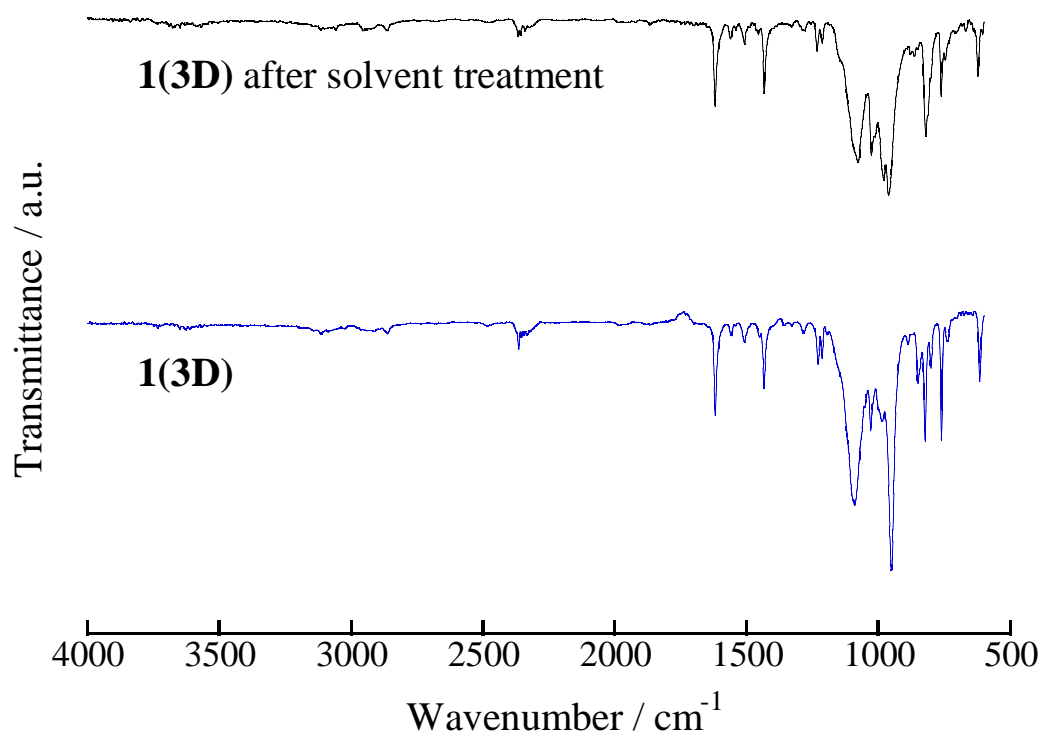

**Figure S4.** FT-IR spectra of **1(3D)** and **1(3D)** after solvent treatment, which correspond to **2(1D)**.

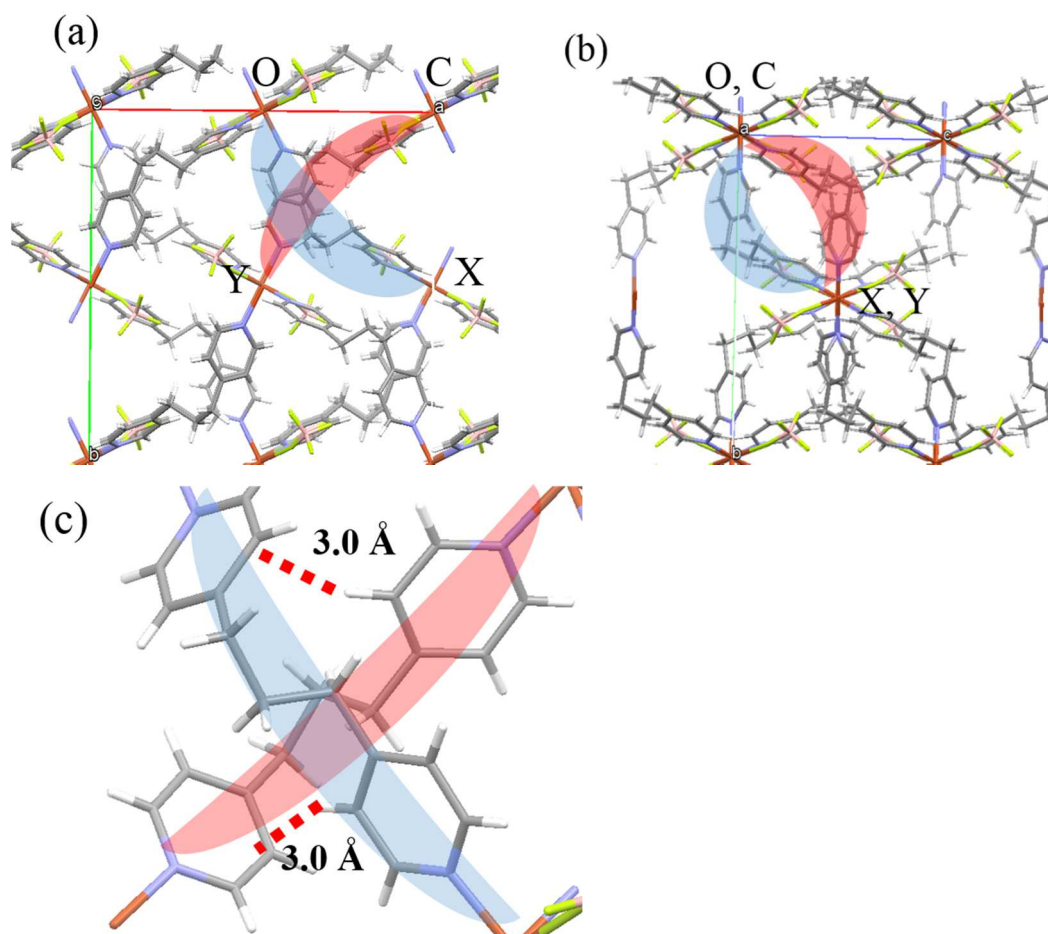

**Figure S5.** Crystal structure of **1(3D)** along (a) *c* axis and (b) *a* axis, and (c) schematic representation of C-H... $\pi$  interaction between bpp ligands.

**Table S1.** CHN elemental analysis of **2(1D)** and **1(3D)** after the solvent treatment.

| element | Calcd. <sup>a</sup> | <b>2(1D)</b> [2] | <b>1(3D)</b> after the solvent treatment |
|---------|---------------------|------------------|------------------------------------------|
| C/ %    | 49.30               | 49.09            | 49.15                                    |
| H/ %    | 4.50                | 4.57             | 4.52                                     |
| N/ %    | 8.80                | 8.75             | 8.83                                     |

a. The values were calculated based on the chemical formula of  $[\text{Cu}(\text{BF}_4)_2(\text{bpp})_2]$ .

**Table S2.** Full width at half maximum (FWHM) of selected diffraction lines in XRD patterns.

| Sample                | FWHM (°) of each diffraction line |       |       |       |       |
|-----------------------|-----------------------------------|-------|-------|-------|-------|
|                       | Miller indices                    |       |       |       |       |
|                       | 110                               | 111   | 111   | 401   | 221   |
| Directly prepared one | 0.167                             | 0.192 | 0.234 | 0.307 | 0.241 |
| Converted one         | 0.271                             | 0.222 | 0.376 | 0.348 | 0.381 |

**Table S3.** Results of the mixed solution adsorption by gas chromatography.

| Mixture (volume %) | Peak ratio (%)    |                  | Adsorbed amount per Cu atom |
|--------------------|-------------------|------------------|-----------------------------|
|                    | Before adsorption | After adsorption |                             |
| Benzene (50%)      | 52.0              | 49.0             | 1.9                         |
| Cyclohexane (50%)  | 48.0              | 51.0             | -                           |

#### References

- [1] E. Nishibori, M. Takata, K. Kato, M. Sakata, Y. Kubota, S. Aoyagi, Y. Kuroiwa, M. Yamakata, N. Ikeda, *Nucl. Instrum. Methods A*, **2001**, *467-468*, 1045.
- [2] R. Kotani, A. Kondo, K. Maeda., *Chem. Commun.*, **2012**, *48*, 11316.
